# Supplementary material for: Characterization of acetohydroxyacid synthase from the hyperthermophilic bacterium Thermotoga maritima
Source: PubMed Central journal article supplement — Biochem Biophys Rep. 2015 Aug 28;4:89–97. doi: 10.1016/j.bbrep.2015.08.014 (PMC5668897; doi:10.1016/j.bbrep.2015.08.014), 2015-08-28
Supplement: mmc1.pdf [file mmc1.pdf]

**Characterization of acetohydroxyacid synthase from the hyperthermophilic bacterium *Thermotoga maritima***

Mohammad S. Eram†, Benozir Sarafuddin, Frank Gong, and Kesen Ma \*

Department of Biology, University of Waterloo, Waterloo, Ontario, Canada

Running title: Acetohydroxyacid synthase in *Thermotogales*

\*Address correspondence to

Kesen Ma  
Department of Biology  
University of Waterloo  
200 University Avenue West  
Waterloo, Ontario N2L 3G1  
Canada  
Tel: 1-519-8884567 x33562  
Fax: 1-519-746-0614  
E-mail: kma@uwaterloo.ca

†Present address: Structural Genomics Consortium, University of Toronto, Toronto, Ontario, Canada.

## **Contents:**

Supplementary Figure S1 Construction of expression plasmids

Supplementary Figure S2 Phylogenic relatedness of AHAS subunits



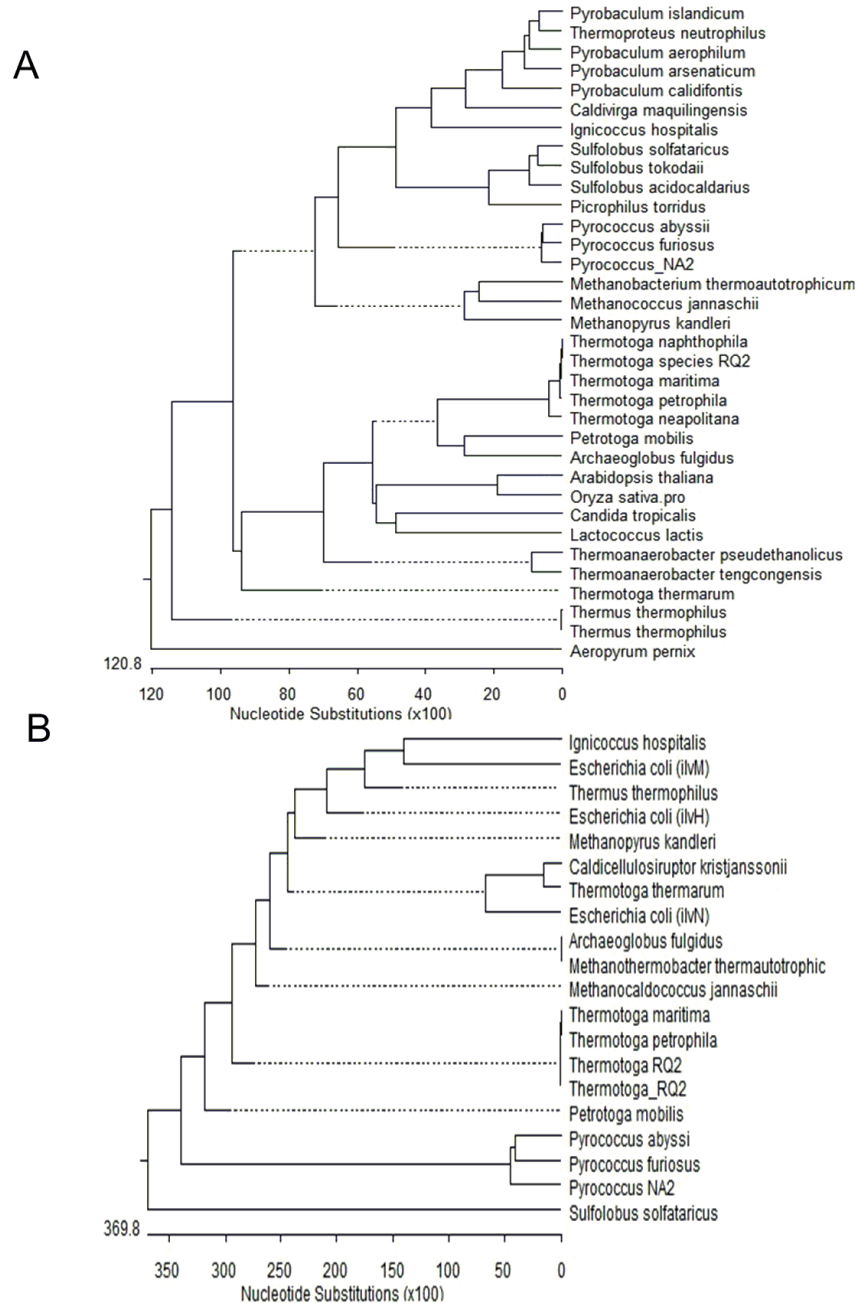

### Supplementary Figure S2 Phylogenetic relatedness of AHAS subunits

The phylogenetic relatedness was determined for **(A)** catalytic and **(B)** regulatory subunits of AHAS. Genome sequences in the NCBI microbial genome database ([http://www.ncbi.nlm.nih.gov/genomes/MICROBES/microbial\\_taxtree.html](http://www.ncbi.nlm.nih.gov/genomes/MICROBES/microbial_taxtree.html)) were used to retrieve the amino acid and nucleotide sequences of AHASs from various thermophilic and mesophilic organisms. The amino acid sequence homology and the phylogenetic tree were prepared based on the ClustalW analysis using MegAlign software (Lasergene, DNASTar, Madison, USA).
